# Supplementary material for: 3-D binder-free graphene foam as a cathode for high capacity Li–O2 batteries
Source: Royal Society of Chemistry journal article supplement (doi:10.1039/c5ta10690g), 2016-01-01
Supplement: c5ta10690g1.pdf [file c5ta10690g1.pdf]

## Supporting Information

### 3-D binder-free graphene foam as cathode for high capacity Li-O<sub>2</sub> batteries

Chenjuan Liu,<sup>a</sup> Reza Younesi,<sup>a</sup> Cheuk-Wai Tai,<sup>b</sup> Mario Valvo,<sup>a</sup> Kristina Edström,<sup>a</sup> Torbjörn Gustafsson<sup>a</sup>, and Jiefang Zhu<sup>\*a</sup>

<sup>a</sup> Department of Chemistry-The Ångström Laboratory, Uppsala University, Box 538, SE-751 21 Uppsala, Sweden.

E-mail: [jiefang.zhu@kemi.uu.se](mailto:jiefang.zhu@kemi.uu.se); Fax: +46 18 51 3548; Tel: +46 18 471 3722

<sup>b</sup> Department of Materials and Environmental Chemistry, Stockholm University, SE 106 91 Stockholm, Sweden

**Table S1:** Preparation details for recently reported graphene cathode materials.

| Sample                            | Technology                                                    | electrolyte                                                                                       | Free-standing           | Ref.                |
|-----------------------------------|---------------------------------------------------------------|---------------------------------------------------------------------------------------------------|-------------------------|---------------------|
| GNSs                              | 1050°C thermal reduction<br>30s                               | 1 M LiPF <sub>6</sub> in PC/EC (1:1)                                                              | No                      | 1                   |
| Functionalized<br>graphene sheets | 1050°C thermal reduction<br>30s                               | 1 M LiTFSI in TEGDME                                                                              | No<br>(25%PTFE)         | 2                   |
| Nitrogen-doped<br>graphene sheets | 900°C reduced by<br>ammonia                                   | 1 M LiPF <sub>6</sub> in TEGDME                                                                   | No<br>(10%PTFE)         | 3                   |
| metal-free GNSs                   | 950°C reduced by<br>4%H <sub>2</sub> /Ar                      | 1 M LiClO <sub>4</sub> in ED/DEC<br>(organic) and 1 M LiNO <sub>3</sub><br>+ 0.5 M LiOH (aqueous) | No<br>(7%PTFE)          | 4                   |
| GNSs                              | Reduced by hydrazine<br>hydrate                               | 1 M LiClO <sub>4</sub> in PC                                                                      | No<br>(10%PTFE)         | 5                   |
| Co-N-MWNTs                        | Graphitized heteroatom<br>polymer, PANI, high-<br>temperature | 1 M LiPF <sub>6</sub> in TEGDME                                                                   | No<br>(9%PVDF)          | 6                   |
| S-GNSs                            | 1050°C thermal reduction<br>1h                                | 1 M LiPF <sub>6</sub> in TEGDME                                                                   | No<br>(10%PVDF)         | 7                   |
| N-doped<br>exfoliated<br>graphene | 1050°C thermal reduction<br>30S                               | 1 M LiPF <sub>6</sub> in TEGDME                                                                   | No<br>(71%PVDF-<br>HFP) | 8                   |
| Graphene flakes                   | high-temperature<br>treatment                                 | 1 M LiTFSI in DME                                                                                 | No<br>(15%PVDF)         | 9                   |
| Graphene<br>carbon/Ni foam        | 800°C thermal treatment<br>2h in N <sub>2</sub>               | 1 M LiTFSI in DME                                                                                 | Yes                     | 10                  |
| Graphene foams                    | Electrochemical<br>exfoliation                                | 1 M LiCF <sub>3</sub> SO <sub>3</sub> in<br>TEGDME                                                | Yes                     | 11                  |
| <b>GF@Al foam</b>                 | <b>300°C low-temperature<br/>treatment</b>                    | <b>1 M LiClO<sub>4</sub> in DMSO</b>                                                              | <b>Yes</b>              | <b>Our<br/>work</b> |

**Table S2:** Battery properties for recently reported graphene cathode materials.

| Sample                         | Dominant discharge product                                                                                 | Morphology of discharge product                            | Capacity (mAh/g)                 | Rechargeability                             | Ref.            |
|--------------------------------|------------------------------------------------------------------------------------------------------------|------------------------------------------------------------|----------------------------------|---------------------------------------------|-----------------|
| GNSs                           | Li <sub>2</sub> CO <sub>3</sub> (XRD)                                                                      | film                                                       | 8705.9 mAh/g at 75 mA/g          | unknown                                     | 1               |
| Functionalized graphene sheets | Li <sub>2</sub> O <sub>2</sub> (XRD)                                                                       | Particles                                                  | 15000 mAh/g at ~ 48 mA/g*        | unknown                                     | 2               |
| N-doped graphene sheets        | Li <sub>2</sub> O <sub>2</sub> (XRD)                                                                       | 200~500 nm particles                                       | 11660 mAh/g at 75 mA/g           | unknown                                     | 3               |
| metal-free GNSs                | unknown                                                                                                    | unknown                                                    | unknown                          | 50th, (80mAh/g), at 0.5mA/cm <sup>2</sup>   | 4               |
| GNSs                           | Li <sub>2</sub> CO <sub>3</sub> (XRD)                                                                      | unknown                                                    | unknown                          | 5th, at 50mA/g                              | 5               |
| Co-N-MWNTs                     | Li <sub>2</sub> O <sub>2</sub> (XRD)                                                                       | unknown                                                    | 3700 mAh/g at 50 mA/g            | 50th, (1500-1000mAh/g), at 400mA/g          | 6               |
| S-GNSs                         | Li <sub>2</sub> O <sub>2</sub> (XRD)                                                                       | Nanorods, nanosheets and toroids in different current      | 4300 mAh/g at 75 mA/g            | unknown                                     | 7               |
| N-doped exfoliated graphene    | Li <sub>2</sub> O <sub>2</sub> (XRD)                                                                       | unknown                                                    | 11 746 mAh/g at 70 mA/g          | unknown                                     | 8               |
| Graphene flakes                | Li <sub>2</sub> CO <sub>3</sub> (XRD, FT-IR), Li <sub>2</sub> O <sub>2</sub> and Li <sub>2</sub> O (FT-IR) | Particles                                                  | 3914 mAh/g at 330 mA/g           | unknown                                     | 9               |
| Graphene carbon/Ni foam        | Li <sub>2</sub> O <sub>2</sub> (XRD)                                                                       | toroidal                                                   | 11 060 mAh/g at 280 mA/g         | 10th, (2000mAh/g), at 0.5mA/cm <sup>2</sup> | 10              |
| Graphene foams                 | unknown                                                                                                    | unknown                                                    | unknown                          | 20th, (1000mAh/g), at 100mA/g               | 11              |
| <b>GF@Al foam</b>              | <b>Li<sub>2</sub>O<sub>2</sub>, LiOH (XRD)</b>                                                             | <b>toroidal, spherical, disc shape, and nanosheet-like</b> | <b>~ 90000 mAh/g at 100 mA/g</b> | <b>27th, (1000mAh/g), at 100mA/g</b>        | <b>Our work</b> |

\*calculated from data reported in the reference.

It should, however, be noted that different types of binder have been used in most of these graphene-catalyzed cathode materials. It has been shown that binders are unstable in Li-O<sub>2</sub> cells and increase the electrolyte decomposition during cycling, decrease the electrode porosity and the electrical conductivity, while lowering the O<sub>2</sub>-diffusion rate<sup>12, 13</sup>. As shown in Table 1, high

temperatures are also often required in the post synthesis treatment processes. Economical factors or technical problems associated with up-scaled production of graphene-catalyzed cathode unfortunately can't be widely addressed. The possibility of utilizing the graphene foam for the design of facile, inexpensive and binder-free electrode described in the present work, is certainly appealing. We therefore feel that our work provides new insight to the oxygen electrode design and that the results presented here may also open up new routes for the fabrication of low-cost and binder-free electrodes for Li-O<sub>2</sub> cells. The tables were added to the supporting information.

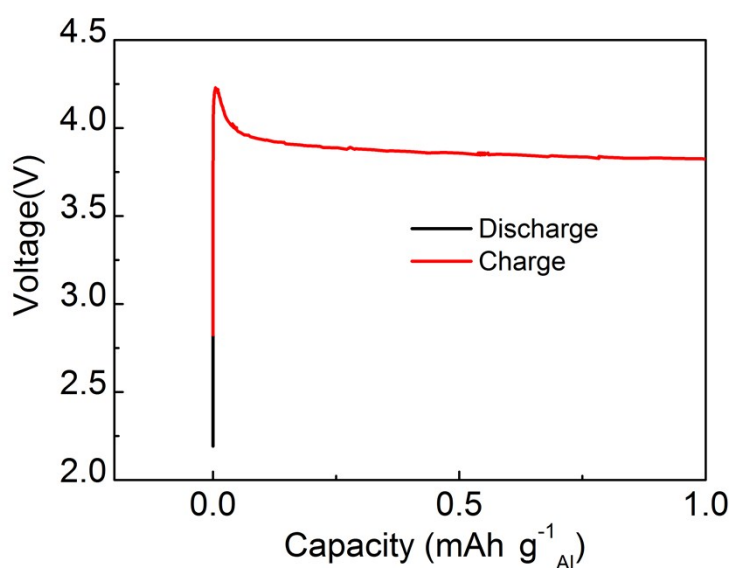

**Fig. S1.** Discharge-charge curves of Al foam in a Li-O<sub>2</sub> cell using 1 M LiClO<sub>4</sub> in DMSO as electrolyte.

The discharge capacity is almost zero. It is the evidence that the Al foam has no contribution in the discharge capacity. Therefore, the charge plateau around 3.9 V represents the oxidation of the electrolyte.

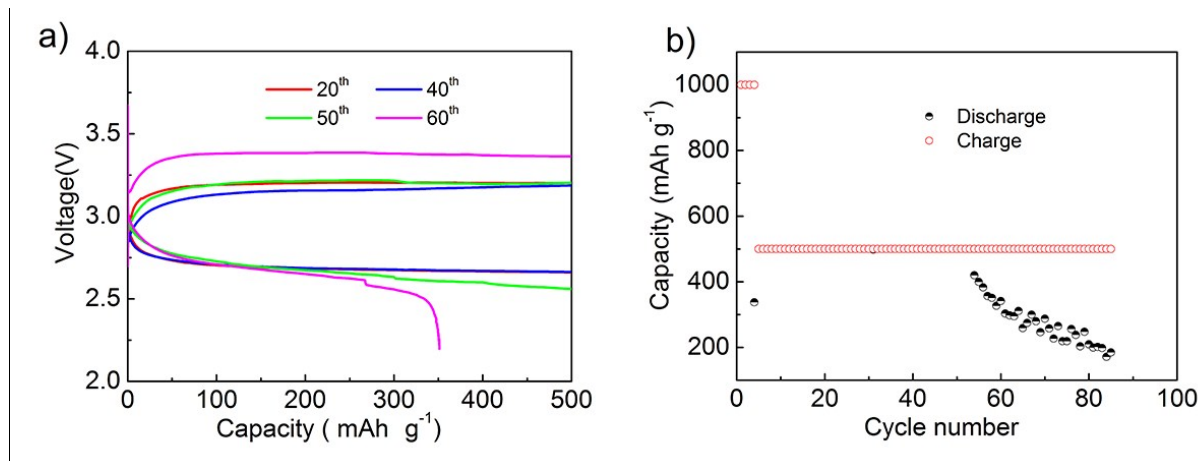

**Fig. S2.** (a) Charge-discharge curves and (b) cycling performance of GF@Al at a current density of  $200 \text{ mA g}^{-1}$  with capacity limitation of  $1000 \text{ mAh g}^{-1}$  for the first 5 cycles and then at current density of  $100 \text{ mA g}^{-1}$  with capacity limitation of  $500 \text{ mAh g}^{-1}$ .

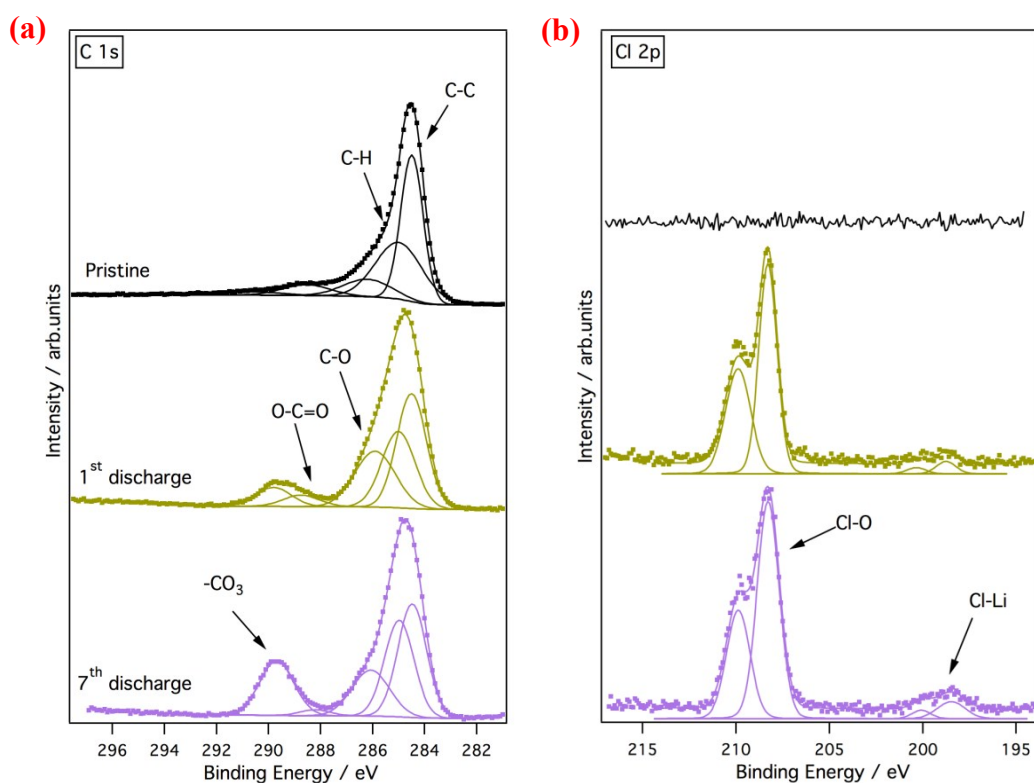

**Fig. S3** (a) C 1s and (b) Cl 2p core level XPS spectra of pristine and cycled electrodes after the 1<sup>st</sup> and the 7<sup>th</sup> discharge. The discharge capacity was limited to  $1000 \text{ mAh/g}$  at a current density of  $100 \text{ mA/g}$ .

The C 1s XPS spectra in Fig. S3 show that some decomposition products containing ether and carboxylate bonds formed on the surface of graphene electrode after the 1<sup>st</sup> discharge. The results also revealed a noticeable contribution from carbonate ( $-\text{CO}_3$ ) decomposition product to the C1s spectrum of the graphene electrode after the 7<sup>th</sup> discharge. This feature can be correlated with the fact that the  $\text{Li}_2\text{CO}_3$

side products have been formed after cycling. The 1<sup>st</sup> and 7<sup>th</sup> discharge samples contain one main peak at the binding energy of about 208 eV with the spin-orbit split doublets (Cl 2p<sub>1/2</sub>) at 1.6 eV higher binding energy ascribed to LiClO<sub>4</sub> salt. The other component with lower intensity at about 198.5 eV could be assigned to Cl bonded to elements with low electronegativity (e.g. LiCl).<sup>14</sup> A comparison of the spectra after the 1<sup>st</sup> discharge and after the 7<sup>th</sup> discharge shows a moderate increase of the Cl-Li feature, thereby suggesting that additional surface degradation species could have been formed by LiClO<sub>4</sub> salt decomposition.

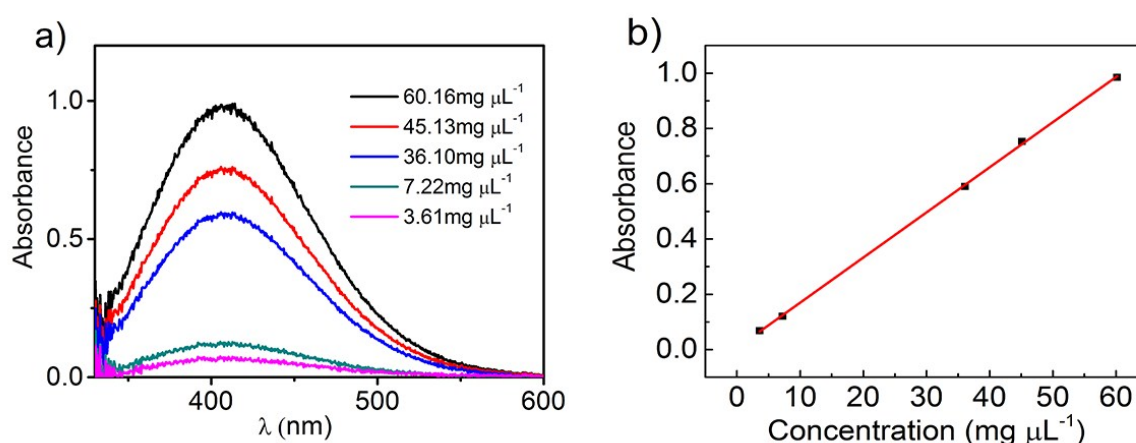

**Fig. S4.** a) The absorption spectra of [Ti(O<sub>2</sub><sup>2-</sup>)]<sup>2+</sup> complex originating from the reaction between the Ti(IV)OSO<sub>4</sub> solution and commercial Li<sub>2</sub>O<sub>2</sub> of different concentrations. b) The standard absorption curve of [Ti(O<sub>2</sub><sup>2-</sup>)]<sup>2+</sup> complex derived from a).

Before the analysis of our cathodes, commercial Li<sub>2</sub>O<sub>2</sub> was used to establish a standard titration curve. A given amount of Li<sub>2</sub>O<sub>2</sub> was dissolved into an aqueous solution of Ti(IV)OSO<sub>4</sub>. The Li<sub>2</sub>O<sub>2</sub> reacted with H<sub>2</sub>O and produced H<sub>2</sub>O<sub>2</sub>. The subsequent reaction between H<sub>2</sub>O<sub>2</sub> and Ti(IV)OSO<sub>4</sub> forms a yellow [Ti(O<sub>2</sub><sup>2-</sup>)]<sup>2+</sup> complex with a broad absorption peak at 405 nm,<sup>15</sup> as shown in the following reaction schemes:

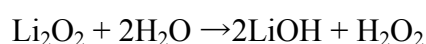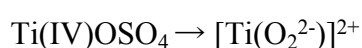

By dissolving different amounts of Li<sub>2</sub>O<sub>2</sub> into the Ti(IV)OSO<sub>4</sub> aqueous solution we observed a linear relationship between the concentration of Li<sub>2</sub>O<sub>2</sub> and the characteristic extinction of the

$[\text{Ti}(\text{O}_2^{2-})]^{2+}$  as shown in Fig. S3. This allows for a quantification of the amount of  $\text{Li}_2\text{O}_2$ . The discharged cathodes were immersed in an aqueous solution of  $\text{Ti}(\text{IV})\text{OSO}_4$  to quantify the discharge product  $\text{Li}_2\text{O}_2$  based on the standard titration curve.

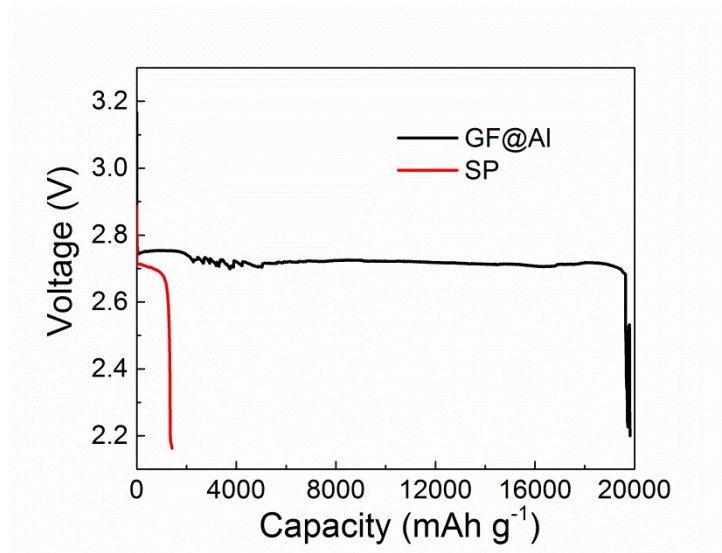

**Fig. S5** the discharge curve of SP and GF@Al cathode for titration

**Table S3.** Discharge  $\text{Li}_2\text{O}_2$  percent yields ( $Y_{\text{Li}_2\text{O}_2}$ ) for different cathode materials

| electrolyte                     | cathode | Capacity( mAh g <sup>-1</sup> ) | $Y_{\text{Li}_2\text{O}_2}$ (%) |
|---------------------------------|---------|---------------------------------|---------------------------------|
| 1M $\text{LiClO}_4/\text{DMSO}$ | GF@Al   | $2 \times 10^4$                 | $33.7 \pm 4.4$                  |
| 1M $\text{LiClO}_4/\text{DMSO}$ | SP      | $1.4 \times 10^3$               | $49.3 \pm 4.9$                  |

The data in Table S3 were acquired from GF@Al and SP electrodes at the current density of  $100 \text{ mA g}^{-1}$ . The  $Y_{\text{Li}_2\text{O}_2}$  values are calculated by using the following equation:

$$Y_{\text{Li}_2\text{O}_2} = \frac{m_{\text{Li}_2\text{O}_2,t}}{m_{\text{Li}_2\text{O}_2,e}}$$

where  $m_{\text{Li}_2\text{O}_2,t}$  and  $m_{\text{Li}_2\text{O}_2,e}$  are the amount of  $\text{Li}_2\text{O}_2$  by titration and the calculated amount by expected given a  $2 e^- / \text{Li}_2\text{O}_2$  process during discharge ( $0.857 \text{ mg Li}_2\text{O}_2$  per mAh would be expected given a  $2 e^- / \text{Li}_2\text{O}_2$  process), respectively.

The surface density and thickness of  $\text{Li}_2\text{O}_2$  on ideal single layer graphene surface after full discharge were calculated from the formula as follows:

$$\bar{m} = \frac{m_{Li_2O_2, e}}{a_{GF}} = \frac{Q \times 0.857 \text{ mg mAh}^{-1}}{A_{GF}} = \frac{9 \times 10^4 \text{ mAh} \cdot \text{g}^{-1} \times 0.857 \text{ mg mAh}^{-1}}{2630 \text{ m}^2 \text{ g}^{-1}} \approx 3 \times 10^{-3} \text{ mg cm}^{-2}$$

$$d_{Li_2O_2, e} = \frac{\bar{m}}{\rho_{Li_2O_2}} = \frac{3 \times 10^{-3} \text{ mg cm}^{-2}}{2.31 \times 10^3 \text{ mg cm}^{-3}} \approx 13 \text{ nm}$$

In which  $m_{Li_2O_2, e}$  is the calculated mass of  $Li_2O_2$  with the given 2 e<sup>-</sup>/  $Li_2O_2$  process during discharge,  $Q$  is the discharge capacity,  $\bar{m}$  is the mass of the  $Li_2O_2$  product on average graphene surface,  $a_{GF}$  and  $A_{GF}$  are the theoretical surface area and specific surface area of graphene, and  $d_{Li_2O_2, e}$  is the thickness of calculated  $Li_2O_2$  on graphene surface.

When the layer of graphene  $n$  is not a single layer:

$$n=2, \quad d_{Li_2O_2, e} = 26 \text{ nm}$$

$$n=3, \quad d_{Li_2O_2, e} = 39 \text{ nm}$$

$$n=4, \quad d_{Li_2O_2, e} = 52 \text{ nm}$$

Even with a multilayer structure graphene, the calculated  $Li_2O_2$  thickness is still at a reasonable range.

## References

1. Y. Li, J. Wang, X. Li, D. Geng, R. Li and X. Sun, *Chem Commun (Camb)*, 2011, **47**, 9438-9440.
2. J. Xiao, D. H. Mei, X. L. Li, W. Xu, D. Y. Wang, G. L. Graff, W. D. Bennett, Z. M. Nie, L. V. Saraf, I. A. Aksay, J. Liu and J. G. Zhang, *Nano Lett*, 2011, **11**, 5071-5078.
3. Y. L. Li, J. J. Wang, X. F. Li, D. S. Geng, M. N. Banis, R. Y. Li and X. L. Sun, *Electrochem Commun*, 2012, **18**, 12-15.
4. E. Yoo and H. Zhou, *Acs Nano*, 2011, **5**, 7.
5. B. Sun, B. Wang, D. Su, L. Xiao, H. Ahn and G. Wang, *Carbon*, 2012, **50**, 727-733.
6. G. Wu, N. H. Mack, W. Gao, S. G. Ma, R. Q. Zhong, J. T. Han, J. K. Baldwin and P. Zelenay, *Acs Nano*, 2012, **6**, 9764-9776.
7. Y. Li, J. Wang, X. Li, D. Geng, M. N. Banis, Y. Tang, D. Wang, R. Li, T.-K. Sham and X. Sun, *J Mater Chem*, 2012, **22**, 20170.

8. D. Higgins, Z. Chen, D. U. Lee and Z. Chen, *J Mater Chem A*, 2013, **1**, 2639.
9. S. Y. Kim, H. T. Lee and K. B. Kim, *Phys Chem Chem Phys*, 2013, **15**, 20262-20271.
10. Z.-L. Wang, D. Xu, J.-J. Xu, L.-L. Zhang and X.-B. Zhang, *Adv Funct Mater*, 2012, **22**, 3699-3705.
11. W. Zhang, J. Zhu, H. Ang, Y. Zeng, N. Xiao, Y. Gao, W. Liu, H. H. Hng and Q. Yan, *Nanoscale*, 2013, **5**, 9651-9658.
12. E. Nasybulin, W. Xu, M. H. Engelhard, Z. Nie, X. S. Li and J.-G. Zhang, *J Power Sources*, 2013, **243**, 899-907.
13. C. V. Amanchukwu, J. R. Harding, Y. Shao-Horn and P. T. Hammond, *Chem Mater*, 2015, **27**, 550-561.
14. J. F. Moulder, W. F. Stickle, P. E. Sobol and K. D. Bomben, *Handbook of X-ray Photoelectron Spectroscopy*, Physical Electronics, Eden Prairie, MN (2000).
15. D. W. O'Sullivan and M. Tyree, *International Journal of Chemical Kinetics*, 2007, **39**, 457-461.
